# Supplementary material
Source: Springer Nature journal article supplement (https://www.springermedizin.de/resource/supplementary/12885_2011_2883_MOESM13_ESM.pdf/9462152)

**A**

# Docetaxel

**SKOV-3**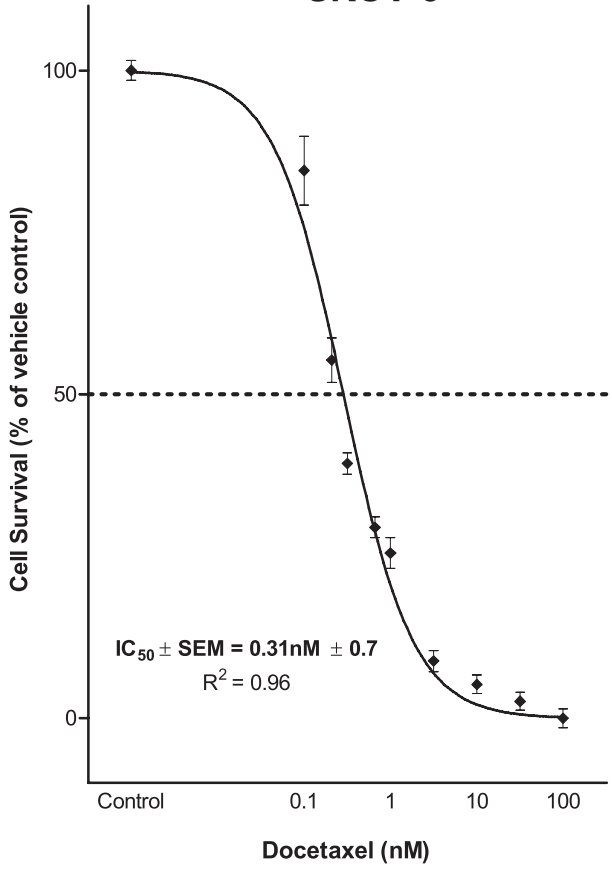**OVCAR-3**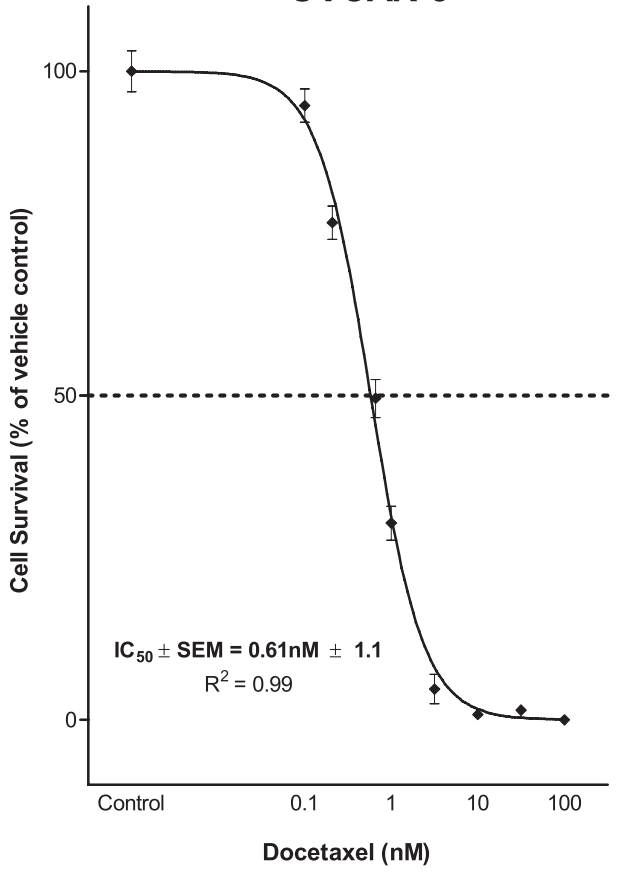**B**

# Carboplatin

**SKOV-3**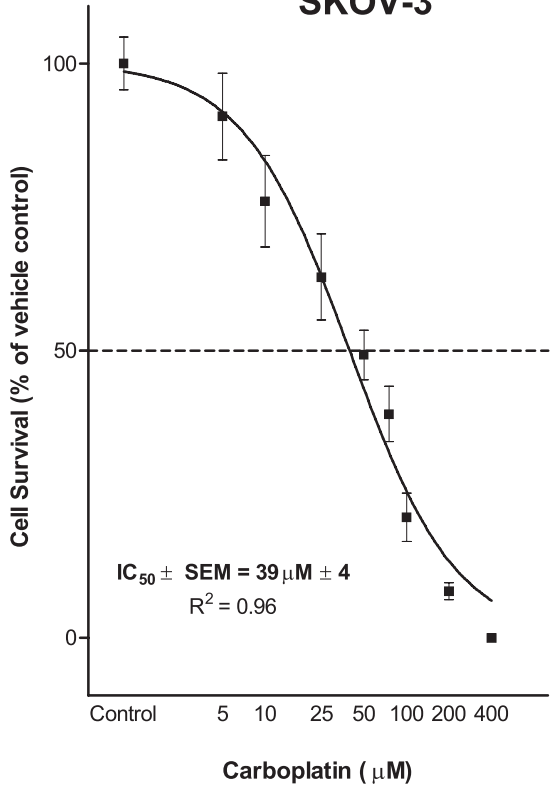**OVCAR-3**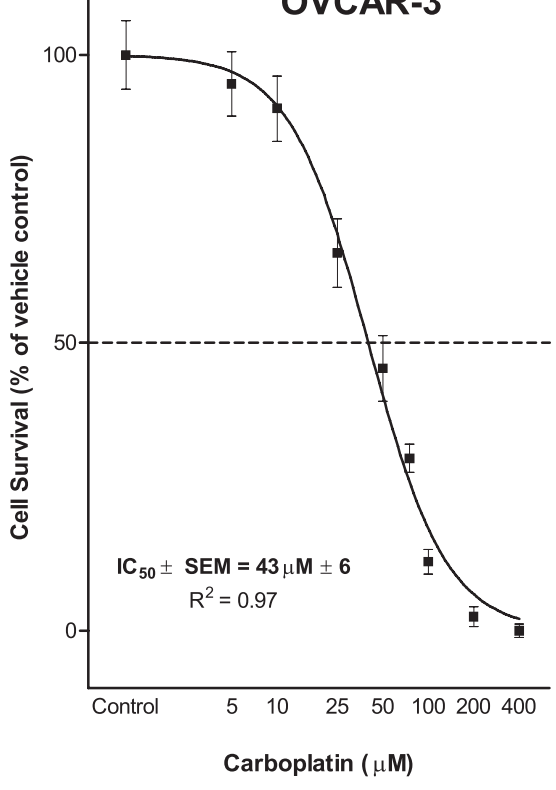

Supplement: MOESM13 [file 9462152]
